# Supplementary material for: Plant SILAC: Stable-Isotope Labelling with Amino Acids of Arabidopsis Seedlings for Quantitative Proteomics
Source: PLoS One. 2013 Aug 20;8(8):e72207. doi: 10.1371/journal.pone.0072207 (PMC3748079; doi:10.1371/journal.pone.0072207)
Supplement: Table S5 — Functional enrichment of proteins down-regulated in salt treatment using DAVID (123 proteins). (XLSX) [file pone.0072207.s007.xlsx]

## Sheet: Supplementary Table 5
Supplementary Table 5: Functional enrichment of proteins down-regulated in salt treatment (123 proteins)
Term ID	Term	Count	Sample frequency	FE	P-value	Proteins
	GO: Biological Process
GO:0006952	defense response	23	18.8525	3.32528	7.31548e-07	AT1G26630, AT4G11650, AT1G45145, AT2G03760, AT1G02930, AT1G23130, AT1G55020, AT2G44490, AT4G16500, AT1G11580, AT5G64120, AT2G47730, AT4G12720, AT4G12480, AT2G14610, AT1G02920, AT4G31500, AT2G21660, AT3G49120, AT5G42980, AT3G54640, AT5G06320, AT3G57260
GO:0055114	oxidation reduction	23	18.8525	2.88789	7.46964e-06	AT3G19010, AT4G20830, AT3G24503, AT1G54100, AT1G62380, AT1G13110, AT1G45145, AT4G32470, AT1G17745, AT1G55020, AT4G03520, AT3G15360, AT3G17790, AT5G64120, AT4G31500, AT3G49120, AT5G42980, AT4G13180, AT1G77120, AT4G11600, AT2G30490, AT3G52730, AT1G12010
GO:0009628	response to abiotic stimulus	23	18.8525	2.86136	8.65777e-06	AT1G54100, AT1G09210, AT1G62380, AT4G37910, AT4G11650, AT1G55450, AT1G07660, AT2G47110, AT1G02930, AT3G56240, AT4G12720, AT2G47730, AT5G54810, AT5G10860, AT2G26740, AT1G02920, AT4G31500, AT2G21660, AT3G49120, AT1G77120, AT4G11600, AT2G30490, AT3G57260
GO:0010035	response to inorganic substance	18	14.7541	4.96383	8.19279e-08	AT1G26630, AT4G37910, AT1G45145, AT1G02930, AT3G56240, AT5G19140, AT3G17790, AT5G64120, AT1G02920, AT2G21660, AT3G49120, AT5G42980, AT4G13180, AT1G77120, AT4G11600, AT4G14030, AT1G17290, AT3G14990
GO:0009651	response to salt stress	16	13.1148	6.45701	1.87329e-08	AT1G54100, AT1G09210, AT4G37910, AT1G62380, AT4G11650, AT1G55450, AT1G02930, AT3G56240, AT2G47730, AT4G12720, AT5G54810, AT5G10860, AT1G02920, AT2G21660, AT1G77120, AT4G11600
GO:0006970	response to osmotic stress	16	13.1148	5.97152	5.2711e-08	AT1G54100, AT1G09210, AT4G37910, AT1G62380, AT4G11650, AT1G55450, AT1G02930, AT3G56240, AT2G47730, AT4G12720, AT5G54810, AT5G10860, AT1G02920, AT2G21660, AT1G77120, AT4G11600
GO:0006979	response to oxidative stress	14	11.4754	7.26414	5.16962e-08	AT4G20830, AT1G09210, AT1G45145, AT1G02930, AT3G56240, AT4G03520, AT3G15360, AT4G12720, AT5G64120, AT3G17790, AT5G54810, AT3G49120, AT5G42980, AT4G11600
GO:0010038	response to metal ion	13	10.6557	5.04139	8.60073e-06	AT1G26630, AT4G37910, AT1G45145, AT1G02930, AT3G56240, AT5G19140, AT1G02920, AT2G21660, AT1G77120, AT4G11600, AT4G14030, AT1G17290, AT3G14990
GO:0019748	secondary metabolic process	13	10.6557	4.57658	2.25865e-05	AT3G19010, AT3G24503, AT1G02930, AT5G48180, AT2G44490, AT2G47730, AT1G02920, AT4G31500, AT2G21660, AT2G30490, AT5G23020, AT5G26000, AT2G02390
	GO: Cellular Compartment
GO:0005886	plasma membrane	41	33.6066	2.64128	1.55575e-09	AT4G20830, AT4G30190, AT3G01290, AT1G62380, AT5G19440, AT1G45145, AT2G31390, AT2G36160, AT5G05010, AT5G19140, AT4G30270, AT1G66240, AT4G27450, AT2G47730, AT3G28940, AT3G49120, AT3G03270, AT5G42980, AT2G36830, AT1G77120, AT4G11600, AT5G06320, AT1G51760, AT4G29350, AT2G45140, AT5G19550, AT4G37910, AT2G38530, AT1G07660, AT2G47110, AT4G32470, AT1G11580, AT5G43970, AT4G11220, AT4G08850, AT4G31500, AT1…
GO:0005618	cell wall	25	20.4918	5.8728	2.16667e-12	AT4G20830, AT3G57240, AT1G62380, AT1G17860, AT5G64120, AT4G30270, AT2G43570, AT2G14610, AT3G49120, AT5G42980, AT3G44100, AT3G57260, AT5G19550, AT4G37910, AT1G75750, AT1G02930, AT4G16500, AT1G11580, AT3G15360, AT3G06860, AT2G30490, AT2G16060, AT3G22060, AT5G37600, AT5G26000
GO:0005773	vacuole	19	15.5738	4.2412	3.32334e-07	AT4G20830, AT2G27730, AT2G47710, AT3G01290, AT1G09210, AT1G07660, AT2G47110, AT1G02930, AT4G16500, AT1G02920, AT3G49120, AT5G42980, AT3G54640, AT2G36830, AT3G44100, AT3G57260, AT3G22060, AT3G14990, AT5G26000
A total of 123 genes were submitted to the David Functional Enrichment Chart Tool.
Count	Number of submitted genes with GO term
Sample frequency	Proportion of submitted genes with GO term (%)
FE	Relative fold enrichment of GO term compared with Arabidopsis gene background (TAIR)
P-value	The p-value cutoff was: 0.05
